1 **Complex genetic architecture underlying the plasticity of maize agronomic traits**

2

3 Minliang Jin<sup>1</sup>, Haijun Liu<sup>2</sup>, Xiangguo Liu<sup>3</sup>, Tingting Guo<sup>1,4</sup>, Jia Guo<sup>3</sup>, Yuejia Yin<sup>3</sup>, Yan Ji<sup>5</sup>,  
4 Zhenxian Li<sup>6</sup>, Jinhong Zhang<sup>6</sup>, Xiaqing Wang<sup>1</sup>, Feng Qiao<sup>1</sup>, Yingjie Xiao<sup>1,4</sup>, Yanjun Zan<sup>7\*</sup>,  
5 Jianbing Yan<sup>1,4\*</sup>

6

7 <sup>1</sup>National Key Laboratory of Crop Genetic Improvement, Huazhong Agricultural University,  
8 Wuhan, 430070, China

9 <sup>2</sup>Gregor Mendel Institute, Austrian Academy of Sciences, Vienna BioCenter, 1030, Vienna,  
10 Austria

11 <sup>3</sup>Institute of Agricultural Biotechnology, Jilin Academy of Agricultural Sciences, Changchun,  
12 130033, China

13 <sup>4</sup>Hubei Hongshan Laboratory, Wuhan, 430070, China

14 <sup>5</sup>College of Life Sciences, Sichuan University, Chengdu, 610065, China

15 <sup>6</sup>Institute of Agricultural Sciences of Xishuangbanna Prefecture of Yunnan Province,  
16 Jinghong, 666100, China

17 <sup>7</sup>Umeå Plant Science Center, Department of Forestry Genetics and Plant Physiology,  
18 Swedish University of Agricultural Sciences, Umeå, 90736, Sweden

19

20 \*Corresponding authors

21 Jianbing Yan,

22 Email: [yjianbing@mail.hzau.edu.cn](mailto:yjianbing@mail.hzau.edu.cn)

23 Yanjun Zan,

24 Email: [yanjun.zan@slu.se](mailto:yanjun.zan@slu.se)

25 **Abstract**

26 Phenotypic plasticity is the property of a given genotype to produce multiple phenotypes in  
27 response to changing environmental conditions. Understanding the genetic basis of  
28 phenotypic plasticity and establishing a predictive model is highly relevant for future  
29 agriculture under changing climate. Here, we report findings on the genetic basis of  
30 phenotypic plasticity for 23 complex traits using a maize diverse population, planted at five  
31 sites with distinct environmental conditions and genotyped with ~ 6.60 million SNPs. We  
32 found that altitude-related environmental factors were main drivers for across site variation in  
33 flowering time traits but not plant architecture and yield traits. For 23 traits, we detected 109  
34 QTLs, of which 29 was for mean, 66 was for plasticity, and 14 for both parameters, besides,  
35 80% of the QTLs were interreacted with the environment. The effects of several QTLs  
36 changed in magnitude or sign, driving variation in phenotype plasticity, and we further  
37 experimentally validated one plastic gene *ZmTPSI4.1* whose effect was likely mediated by  
38 the compensation effect of *ZmSPL6* which was from the downstream pathway probably. By  
39 integrating genetic diversity, environmental variation, and their interaction in a joint model,  
40 we could provide site-specific predictions with increased accuracy by as much as 15.5%,  
41 3.8%, and 4.4% for DTT, PH, and EW, respectively. Overall, we revealed a complex genetic  
42 architecture involving multiallelic, pleiotropy, and genotype by environment interaction  
43 underlying maize complex trait mean and plasticity variation. Our study thus provided novel  
44 insights into the dynamic genetic architectures of agronomic traits in response to changing  
45 environments, paving a practical route to precision agriculture.

46

47 **Keywords: Complex traits, Phenotype plasticity, QTL by environment interaction,**  
48 **Crop improvement, *Zea mays***

## 49 **Introduction**

50 Upon climate change, plants display plastic response, where a single genotype produces  
51 multiple phenotypes through changes in gene expression, physiological and morphological  
52 levels<sup>1,2</sup>. Such plastic response (phenotype plasticity) was also described as genotype by  
53 environment interaction (G-by-E)<sup>3-5</sup>, with organisms changing their performance across  
54 environments, releasing heritable variation<sup>6-9</sup> that are highly relevant in complex trait  
55 variation and adaptation<sup>4,10-12</sup>. In the context of crop breeding, one strategy is to minimize  
56 plasticity or G-by-E interaction by using the best linear unbiased prediction value (BLUP),  
57 making developed cultivar broadly applicable to a wide range of environments<sup>13</sup>.  
58 Alternatively, performance could be maximized in individual environments by enriching site-  
59 specific beneficial alleles that are either neutral or unfavourable at other sites<sup>12,14</sup>. This is  
60 similar to what natural selection have acted on wild populations, where local adaptation has  
61 resulted in genotypes with optimized phenotypes at their native environments that are often  
62 maladapted in new environments<sup>15-18</sup>.

63 Increased plasticity may represent the future of crop breeding and biodiversity management  
64 in the light of climate change, as such strategy confers high resilience genotypes for future  
65 challenges while achieving optimal phenotype locally. To achieve this goal, efforts have been  
66 made to study the genetic architecture of plasticity<sup>19-22</sup> and dissect the underlying QTLs<sup>4,11,23-</sup>  
67 <sup>26</sup>. Studies in maize have revealed both similarity and difference in the genetic architectures  
68 of trait mean and plasticity<sup>24,25</sup>, suggesting breeders could manipulate trait mean and  
69 plasticity semi-independently to meet the challenge of feeding the growing population.  
70 Further investigations demonstrated the role of plastic QTLs in heterosis and adaptation from  
71 tropical to temperate zone, paving the way to genomic-promised crop improvement by  
72 manipulating the phenotypic plasticity<sup>27,28</sup>.

73 Despite the insights gained through these efforts, several questions remain elusive. First,  
74 there is a lack of understanding of the dynamics of complex traits genetic architectures across  
75 environments, such as the impact of specific environmental factors on range-wide complex  
76 trait variation, how dynamic are the genetic architectures of agronomic traits over major  
77 production zone? What alleles are favoured at each production site? Whether they have  
78 genetic effects on multiple traits with antagonistic pleiotropy? How much genetic gain could  
79 be achieved by exploiting these alleles?

80 Second, in Fisher's decomposition of phenotype mean, the environmental effect is a  
81 combinatory effect from multiple environmental factors, such as temperature, day length, and  
82 soil conditions, etc. With an increased ability to quantify air and soil conditions using  
83 developments in remote sensing, it is of great interest to decompose the combinatory  
84 environment effects into effects from concrete environmental factors and study their impact  
85 on complex trait variation and prediction. Last but not least, plasticity was often treated as a  
86 composite index<sup>19-22</sup>, neglecting the fact that plasticity is environment-dependent, being  
87 variable when quantified using different combinations of environments. With a growing  
88 number of environments that we could investigate, it is worthwhile to differentiate plasticity  
89 quantified using an overall index and refine plasticity measures from specific combinations  
90 of environments.

91 To provide a deeper insight into these questions, we developed the Complete-diallel plus  
92 Unbalanced Breeding-derived Inter-Cross (CUBIC) population of 1404 advanced inter-cross  
93 lines from 24 representative breeding founders<sup>29</sup> and studied the variation of 23 key  
94 agronomic traits at five sites spanning China's major summer maize production zone (Fig.  
95 1A) from northeast at Jilin (JL; N 43° 42', E 125° 18') to central plains at Henan (HN; N 35°  
96 27', E 114° 01'). We revealed major contributions from the latitude-related environmental  
97 factors to across site phenotypic variation for flowering time traits but not for others. And we  
98 dissected the within and across environment variation to 109 QTLs with complex genetic  
99 architectures involving multiallelic, pleiotropy, and genotype by environment interaction. In  
100 particular, we found that extensive QTL by environment interaction and dynamic in mean  
101 QTL effects across environments was driving the variation in phenotype plasticity. A joint  
102 model with site-specific predictions and higher accuracy was developed by integrating  
103 genetic diversity, environmental variation, and their interaction, paving a way to genomics-  
104 directed maize improvement.

105

## 106 **Results**

### 107 *The impact of clinal variation in environmental factors on the mean and plasticity of 23* 108 *maize complex traits*

109 We surveyed the performance of 23 traits across five sites spanning Chinese major summer  
110 maize production zone with longitudinal variation from E114° 01' (Henan; HN) to E125° 18'  
111 (Jilin; JL) and latitudinal variation from N 43° 42' (JL) to N 35° 27' (HN; Fig. 1A). Across

112 the five sites, daily highest temperature (TemH), daily temperature difference (TemD), and  
113 day length (DayL) varied significantly (Fig. 1B, C). Nearly all the traits (22 out of 23, except  
114 for Leaf number below ear, LNBE) were significantly correlated with latitude at the five sites,  
115 suggesting a general contribution from spatially variable environmental factors to maize  
116 agronomic trait variation (Fig. 1D-F; Figure S1; Table S1, S2). Flowering time traits (days to  
117 tassel DTT; days to silking, DTS; days to anthesis, DTA) displayed the strongest latitudinal  
118 variation with trait median measured at JL being ~1.5 times larger than that at HN (Figure S1;  
119 Table S2). Unlike flowering time, clinal variation in plant architecture traits (Plant height, PH;  
120 Ear height, EH; Ear leaf width, ELW) and yield traits were weaker, being more distinctive  
121 between the northern (JL, LN, and BJ) and southern (HB and HN) sites (Fig. 1B, C; Figure  
122 S1).

123 To explore how the 23 traits responded to the across-site environmental perturbation, we first  
124 rank-transformed each trait measured at individual sites and quantified the phenotype  
125 plasticity as coefficient variation of rank (VarR) across the five sites. All the 23 traits  
126 displayed variation in phenotype plasticity (Fig. 1G), and yield traits were more plastic than  
127 flowering time and plant architecture traits. Contributions from environment (E) and  
128 genotype by environment interaction (G-by-E) varied significantly among the three  
129 categories of traits. For example, TemH was the major driver for (median = 84.2%) across-  
130 site variation of flowering time traits (DTT, DTA, and DTS; Fig. 1I), while its contribution to  
131 the variation of remaining traits was much lower (Fig. 1I; media=9%). In contrast, G-by-E  
132 made a higher contribution (median = 32.8%; Fig. 1I) to the across site variation of yield  
133 traits, being consistent with the observation that the proportions of non-additive variance for  
134 yield traits were also higher than that for flowering and architecture traits (Fig. 1H).  
135 Altogether, these results illustrated a general contribution from environment factors (TtmpD,  
136 TtmpH, and DayL) and their interaction with genotype to the variation of maize complex  
137 traits, where the contribution from G-by-E was more prominent for yield traits, indicating the  
138 importance and potential value of studying plasticity for yield improvement.

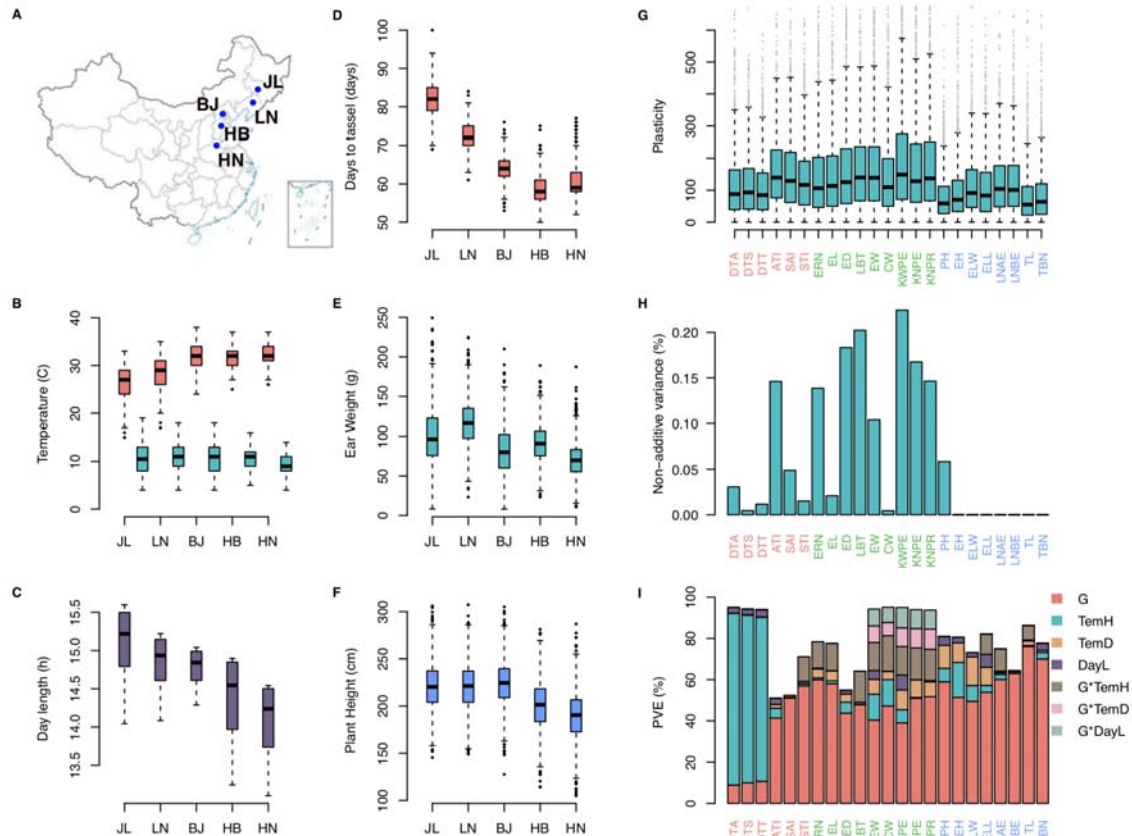

139

140 **Fig. 1 Environmental variation across China's major summer maize production zone**  
 141 **and their impact on the across-site variation of maize complex traits.** **A)** The five  
 142 surveyed sites spanning China's major maize production zone, where 23 agronomic traits  
 143 were phenotyped for 1404 inbred lines. **B)** Boxplot illustrating the highest daily temperature  
 144 (TemH; coloured in cyan) and daily temperature difference (TemD; coloured in tomato)  
 145 from sowing to flowering at the five sites. **C)** Boxplot of the day length (DayL) from  
 146 sowing to flowering at the five sites. **D)** Boxplot of Days to tassel (DTT; coloured in tomato), **E)**  
 147 ear weight (EW; coloured in green) and **F)** Plant height (PH; coloured in cyan) measured at the  
 148 five sites. **G)** Boxplot of the phenotype plasticity measured as a coefficient variation of the  
 149 rank across *s* (Materials and Methods). The 23 traits (labelled in x-axis) were grouped into 3  
 150 categories, flowering traits highlighted in tomato, plant architecture traits labelled in green  
 151 and yield traits labelled in blue. **H)** Bar plot of the proportion of non-additive variance  
 152 (differences between broad-sense heritability, capturing the additive and non-additive effect,  
 153 and narrow-sense heritability, capturing only the additive effect). Each vertical bar represents  
 154 a trait, and the height of the bar is proportional to the difference between corresponding broad  
 155 and narrow-sense heritability. **I)** Contribution from genotype, the three environmental factors  
 156 (TemH, TemD and DayL), and their interactions to the across-site variation of the 23  
 157 agronomic traits. Each vertical bar represents a trait with the corresponding trait name  
 158 labelled in x-axis. The coloured segments within each bar represent the contribution from G,  
 159 TemD, TemH, DayL, and their interaction with G as indicated in the legend. The height of  
 160 the segment is proportional to the variance explained (PVE) by the corresponding variance  
 161 component.

162

163 *Dynamic and complex genetic architecture underlying maize agronomic traits mean and*  
164 *plasticity*

165 For each of the 23 traits, we derived two types of measures to quantify the phenotype  
166 plasticity, where type I included 10 measures<sup>30,31</sup> calculated as pairwise difference among  
167 five sites to capture specific plasticity (SP), and type II included 4 measures representing  
168 overall plasticity (OP): coefficient of variation from raw (CV)<sup>30</sup>, rank transformed data  
169 (VarR)<sup>30</sup>, second principal component (PC2)<sup>30</sup>, and Finlay–Wilkinson regression (FWR)<sup>32</sup>  
170 (Figure S2; Materials and Methods). Together with trait mean value from five sites (Mean)  
171 and BLUP, these four types of measures (SP, OP, Mean, and BLUP) were used to scan for  
172 QTLs underlying trait mean and plasticity, using genome-wide association analysis with 6.6  
173 M genetic polymorphisms (Materials and Methods). In the following section, we first  
174 illustrated the results from DTT as an example and then expanded to results from all 23 traits.  
175 Hereafter, the 4 types of measures were referred to as DTT<sub>BLUP</sub>, DTT<sub>x</sub> (mean measured at site  
176 X), SP-DTT<sub>x-y</sub> (Specific plasticity measured as DTT<sub>x</sub>-DTT<sub>y</sub>, X and Y was site name), and  
177 OP-DTT<sub>z</sub> (Overall plasticity calculated using method z, z was described in Materials and  
178 Methods).

179 *Loci associated with the variation of mean and plasticity measures for days to tassel –*  
180 *Dynamic QTL effects across environments lead to variation in plasticity*

181 A total of 15 QTLs were identified, including 11 QTLs for SP/OP-DTT and 7 QTLs for  
182 DTT<sub>mean</sub>/DTT<sub>BLUP</sub> with 3 overlaps (Fig. 2A-D, QTLs were obtained by grouping independent  
183 SNPs within defined physical distance, Materials and Methods; Table S3, S4, S5). A majority  
184 of the QTLs were detected for DTT<sub>mean</sub> and SP/OP-DTT, while only 2 QTLs were detected  
185 for DTT<sub>BLUP</sub>, highlighting the added value to analyse DTT<sub>mean</sub> and the derived plasticity  
186 measurements individually (Fig. 2B). By contrasting genetic effects of QTLs across sites, two  
187 types of QTLs, whose effects changed in magnitude or direction, were detected with  
188 significant contribution to the variation of DTT plasticity. For example, different genotypes  
189 of QTL8 (chromosome 5: 6,462,711 bp, Fig. 2A-C, E, 667.2 kb upstream of *ZmPHYC2*,  
190 GRMZM2G129889, a homology of *Arabidopsis thaliana* *PHYC*<sup>33</sup>) showed a significant  
191 phenotypic difference for DTT<sub>HN</sub> ( $P = 1.2 \times 10^{-7}$ ; Fig. 2D) and the specific plasticity  
192 measures, calculated as the difference between HN to the other sites (e.g. DTT<sub>HN-BJ</sub>;  $P = 5.3 \times$   
193  $10^{-8}$ ; Fig. 2E), but had no effect at the remaining DTT mean and plasticity measurements (Fig.  
194 2C-E), indicating changes in the magnitude of genetic effects contributed to the variation of

195 DTT plasticity. In contrast, QTL14 (chromosome 9: 35,126,793 bp, Fig. 2A-C, F, 508.5 kb  
 196 upstream of *CONZI*, GRMZM2G405368, a homology of *Arabidopsis thaliana* *CO*<sup>34</sup>), was  
 197 exclusively detected for several DTT plasticity measurements but not for any of the DTT<sub>mean</sub>  
 198 and DTT<sub>BLUP</sub>. The genetic effects of QTL14, however, changed direction from positive  
 199 (DTT<sub>HN</sub>, Additive effect = 0.6 ± 0.2 days; P = 1.7 × 10<sup>-3</sup>; Fig. 2F) to negative (DTT<sub>HN</sub>,  
 200 Additive effect = -0.5 ± 0.2 days; P = 7.3 × 10<sup>-3</sup>; Fig. 2F), leading to significant association  
 201 with specific plasticity, DTT<sub>HN-BJ</sub> (Additive effect = 1.1 ± 0.2 days; P = 6.3 × 10<sup>-12</sup>; Fig. 2D)  
 202 and overall plasticity, DTT<sub>pc2</sub> (P = 4.1 × 10<sup>-9</sup>). The detection of such loci highlighted the  
 203 increased power by analysing plasticity measurements.  
 204 Altogether, these results indicated that changes in magnitude and/or signs of genetic effects  
 205 across sites caused variation in plasticity, which could be detected by GWAS on SP and OP  
 206 measurements. The changing genetic effects highlighted the role of QTL by environment  
 207 interaction in the variation of complex trait mean and plasticity.

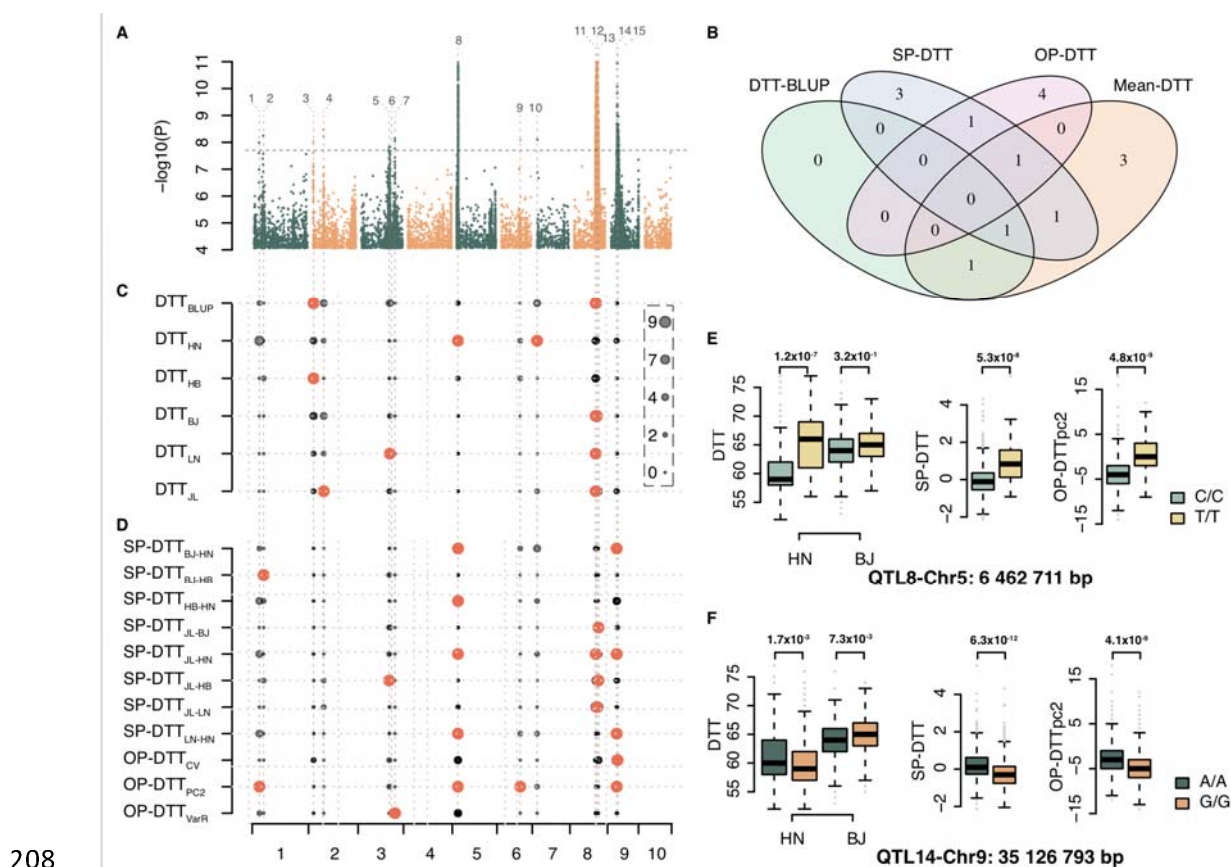

208  
 209 **Fig. 2 Summary of the QTLs associated with the mean and plasticity measures for days**  
 210 **to tassel (DTT).** A) Manhattan plots overlaying genome-wide association scan results for the  
 211 20 mean and plasticity measurements for DTT. The black horizontal dashed line indicated the  
 212 Bonferroni-corrected genome-wide significance threshold derived as 0.05/Me (Me is the



213 effective number of independent SNPs; Materials and Methods), and the vertical dashed  
214 black lines indicate the position of detected QTLs, labelled from 1 to 15. **B)** Venn diagram  
215 illustrating the overlap of QTLs detected for the 4 types of DTT measurements. **C)** QTLs  
216 associated with the DTT means measured at five sites and the  $DTT_{BLUP}$  (y-axis). Each dot  
217 represents a SNP and the size of the dot is proportional to its  $-\log_{10} p$  value as indicated in  
218 the legend on the right. Loci with p-value passed genome wide significance threshold were  
219 coloured in tomato. **D)** QTLs associated with the DTT plasticity measurements (labelled in  
220 the y-axis). **E) and F)** Genotype-to-phenotype maps, highlighting the increased power to  
221 detect additional loci by analysing plasticity measurements, for  $DTT_{HN}$ ,  $DTT_{BJ}$ ,  $DTT_{HN-BJ}$ ,  
222 and  $DTT_{pc2}$  at two QTLs, one at chromosome 5: 6,462,711 bp and a second one at  
223 chromosome 9: 35,126,793 bp.

224

225 *Loci associated with the variation of remaining traits– A complex genetic architecture*  
226 *involving multiallelic, pleiotropy, and genotype by environment interaction underlay maize*  
227 *complex trait variation*

228 For the 23 traits, we identified 109 QTLs for the 4 types of measurements (Fig. 3A; Figure S3;  
229 Table S3, S4, S6), which overlapped partially, with 1.8%, 34.9%, 19.3%, and 21.1% of the  
230 QTLs being unique to BLUP, SP, OP and Mean measurements, respectively (Fig. 3B). As  
231 has been illustrated in the previous section, QTLs associated with SP measurements likely  
232 changed their genetic effects in sign or direction (Fig. 2E, F). This was supported by testing  
233 the interaction between the detected QTLs and the five sites, where 80.0% of the QTLs were  
234 found to be significantly interacting with the sites (Table S7; Materials and methods). This  
235 demonstrated the dynamic genetic effects of mean QTLs across sites and highlighted partial  
236 overlap for QTLs regulating mean and plasticity as reported in the previous studies<sup>24,25,27</sup>.

237 One QTL, spanning 540 kb from chromosome 5: 6,382,800 bp to 6,923,292 bp, involved 7  
238 statistically independent SNPs (Cluster 1 in Fig. 3A, C, QTL 8 in Fig. 2A) and was detected  
239 for multiple trait means and plasticity measures at HN. A detailed exploration showed that  
240 multiple haplotypes were underlying this region with each of the 7 SNPs tagging unique  
241 haplotype (Figure S4), suggesting that the 24 founders carried different functional variants.  
242 Moreover, each of the 7 SNPs was simultaneously associated with multiple trait means at HN,  
243 including flowering time ( $DTT_{HN}$  and  $DTA_{HN}$ ), plant architecture trait (the ear leaf width,  
244  $ELW_{HN}$ ), and multiple SP measurements (SP-DTT, SP-DTA, SP-DTS, SP-PH, SP-EW) at  
245 genome wide significance (Fig. 3C, D). Moderate association to the mean and plasticity  
246 measurements for yield and plant architecture traits were also found at a relaxed significance  
247 threshold ( $P = 6.0 \times 10^{-6}$  for  $EW_{HN}$  and  $P = 5.1 \times 10^{-5}$  for  $PH_{HN}$ ; Fig. 3D), indicating this  
248 region was highly pleiotropic. Notably, the genetic effect of this QTL was unique to HN for

249 all the associated traits, where the “TT” genotype increased DTT, DTA, DTS and “CC”  
 250 decreased ED, EW, ELW, and PH at HN but not at other sites, likely due to interaction with  
 251 temperature (Especially TemD) rather than DayL (Fig. 3E; Figure S5), providing an ideal  
 252 candidate for targeted breeding application at HN.

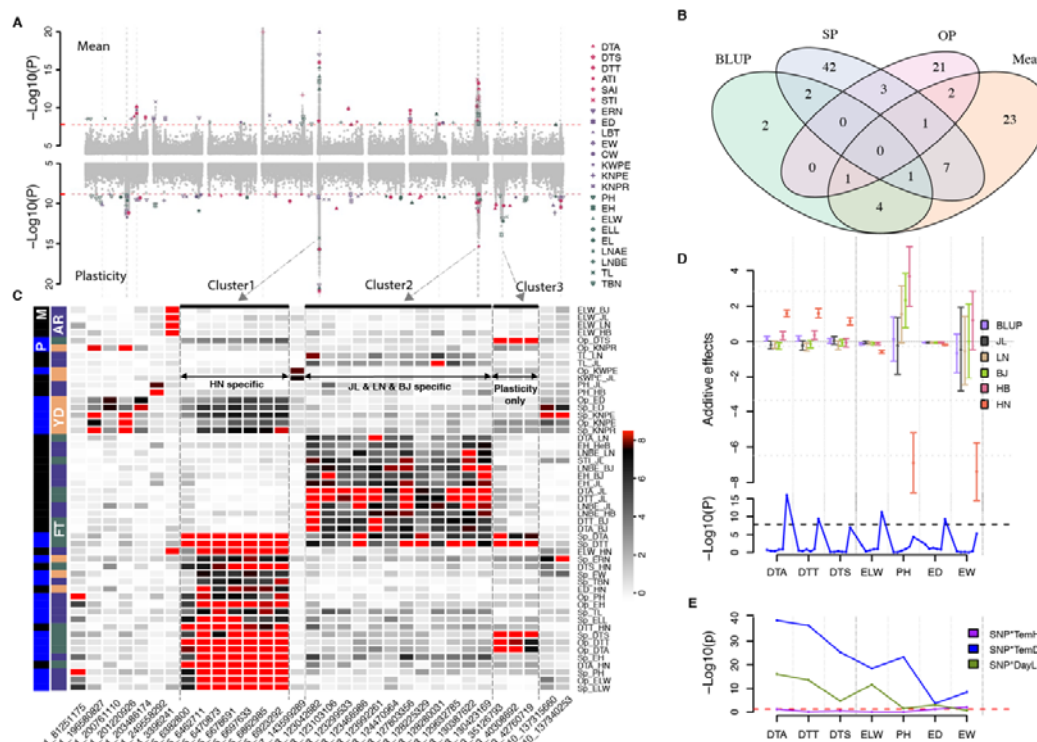

253

254 **Fig.3 Association results of both mean and plasticity for all the 23 traits.** A) Manhattan  
 255 plots of GWAS from all scans, with upper panel for means and lower panel for plasticity  
 256 measurements. The red horizontal dashed lines indicate the Bonferroni-corrected genome-  
 257 wide significance threshold. The vertical dashed grey lines highlight the site of 32 SNPs  
 258 associated with more than 2 measurements. B) Venn diagram illustrating the overlap of QTLs  
 259 detected for the 4 types of measurements. C) A heatmap illustrating the p values of the 32  
 260 SNPs detected for more than 2 measurements (Here, SNPs were used instead of QTLs, as one  
 261 QTL sometimes includes multiple statistically independent SNPs that are physically close to  
 262 each other). Each cell represents the  $-\text{Log}_{10}$  (p values) of a particular SNP (x-axis) associated  
 263 with a specific trait (y-axis on the right). The outer index on the left side marks the mean (M,  
 264 in black) or plasticity (P, in blue) of the traits. The inner index marks the corresponding trait  
 265 types: plant architecture (AR; in purple), flowering time (FT; in olive-green), and yield (YD;  
 266 in orange). For each trait, only the lowest p-values were indicated for either specific plasticity  
 267 (SP) or overall plasticity (OP), labelled as SP-trait or OP-trait. D) The Additive effects varied  
 268 across sites exemplified for cluster 1 (chromosome 5:6 462 711 bp) on multiple traits. The traits  
 269 were separated by the dashed vertical lines and labelled in x-axis, and for each trait the  
 270 measurements for BLUP, individual sites were ordered (from left to right) as indicated in the  
 271 colour legend (from top to bottom). Median and standard error were shown with the middle  
 272 point and error bars. The corresponding GWAS p values were illustrated in the lower panel.  
 273 E) The p-values testing the interaction between this SNP (chromosome 5:6 462 711 bp) and  
 274 the 3 environmental factors.

275

276 A second cluster, spanning 7.4 Mb from chromosome 8: 123,042,682 bp to 130,423,169 bp,  
277 showed both allelic heterogeneity and pleiotropic effect on multiple flowering and plant  
278 architecture traits (Cluster 2 in Fig. 3A, C; Figure S6). However, their genetic effects were  
279 unique to the three northern sites (JL, LN, and BJ; Fig. 3C), except for LNBE<sub>HB</sub>. Compared  
280 with cluster 1, whose effects were unique to HN, such regional effects on multiple northern  
281 sites may have led to the detection of this QTL for multiple sites BLUP measurements.

282 A third cluster (Cluster 3 in Fig. 3A, C) was found contributing exclusively to the variation of  
283 plasticity measurements for all the flowering time traits (DTT, DTA, and DTS) due to the  
284 change of additive effects from negative to positive (Fig. 2F).

285 Altogether, these results illustrated a complex genetic architecture involving multiallelic,  
286 pleiotropy, and genotype by environment interaction underlying maize complex trait  
287 variation. The detection of QTL unique to HN and the three northern sites demonstrated a  
288 variable genetic architecture of maize complex traits across sites possibly due to clinal  
289 variation in QTL effects.

290

### 291 ***The possible molecular basis of phenotype plasticity***

292 Previously, we linked *ZmTPS14.1* (GRMZM2G068943, chromosome 8: 123,129,008 bp to  
293 123,140,283 bp) to variation of flowering time mean<sup>35</sup>, which was located inside the QTL on  
294 chromosome 8 (cluster 2 in Fig. 3, chromosome 8: 123,042,682 bp to 130,423,169 bp). Here,  
295 this QTL was simultaneously associated with mean and plasticity variation of multiple traits,  
296 including DTT, DTA, DTS, ATI, STI, SAI, LNAE, and LNBE at genome-wide ( $P = 1.53 \times$   
297  $10^{-8}$ ) or suggestive significance threshold ( $P = 1.00 \times 10^{-5}$ ) and the tagging SNPs were  
298 interacting with all 3 environmental factors, suggesting a general contribution from QTL by  
299 environmental factor interaction to variation in phenotype plasticity.

300 To experimentally validate and evaluate the plasticity effects of *ZmTPS14.1*, we planted the  
301 knock-out lines of *ZmTPS14.1* obtained in a previous study<sup>35</sup> in Jilin (JL, North China, N 43°  
302 30', E 124° 49') and Hainan (HaiN, South China, N 18° 34', E 108° 43') and compared the  
303 measured flowering time phenotypes. In consistent with the association results, the female  
304 flowering time (DTS) of knock-out lines was earlier in HaiN but not significantly changed in  
305 JL compared to wildtype lines (Fig. 4A; Figure S7A; Table S8). To further explore the

306 underlying molecular basis, we analysed an in-house time-course transcriptome dataset  
307 generated from reference accession B73 under long-day and short-day conditions (Fig. 4B).  
308 The expression of *ZmTPS14.1* under both day-length conditions changed in the same  
309 direction along the time course (Fig. 4B), suggesting there was no day-length dependent  
310 expression response for *ZmTPS14.1*.

311 As has been proposed that plastic response may involve developmental switch genes<sup>36</sup>, we  
312 explored whether plastic effects of genes at the center of the regulatory pathway were  
313 mediated or interacted with downstream genes. Therefore, we evaluated the expression of  
314 candidates downstream of *ZmTPS14.1*. *ZmTPS14.1* encodes Trehalose-6-phosphate synthase  
315 (TPS), which converts glucose-6-phosphate into Trehalose-6-phosphate (T6P), regulating  
316 vegetative development and flowering by miR156/SPL pathway<sup>37</sup>. The expression of  
317 *ZmSPL6* (GRMZM5G878561), an SPL family member downstream of *ZmTPS14.1*, showed a  
318 significant expression pattern difference in response to long/short day length (Fig. 4B).  
319 Meanwhile, the knock-out lines of *ZmSPL6* showed earlier female flowering in JL but no  
320 significant change in HaiN compared to wildtype lines (Fig. 4A; Figure S7B; Table S8),  
321 suggesting day length was an important factor for the plastic effect of *ZmSPL6*. Thus, we  
322 proposed a compensation mechanism from *ZmSPL6* to *ZmTPS14.1* in DTS plasticity (Fig.  
323 4C). In the long-day condition, the continuous expression increase of *ZmSPL6* could make up  
324 for the knockout effect of *ZmTPS14.1*, resulting in no phenotypic difference between the  
325 knock-out lines of *ZmTPS14.1* and wildtype (Fig. 4A). But no such compensation appeared  
326 in the short-day condition, thus we observed the phenotype difference between knockout and  
327 wildtype lines of *ZmTPS14.1* in the short-day condition (Fig. 4A, C). This compensation  
328 mechanism was also reflected in the CUBIC population (Fig. 4D). In the long-day condition  
329 (JL), *ZmTPS14.1* (chromosome 8: 123,138,468 bp) showed significant association ( $P = 1.5 \times$   
330  $10^{-2}$ ) with DTS in the TT allele background of *ZmSPL6* (-), but not significant in GG allele  
331 background of *ZmSPL6* (+). And in the short-day condition (HN), the significant association  
332 between *ZmTPS14.1* and DTS was detected in both *ZmSPL6* (-) ( $P = 8.9 \times 10^{-5}$ ) or *ZmSPL6*  
333 (+) ( $P = 5.0 \times 10^{-3}$ ) backgrounds (Fig. 4D).

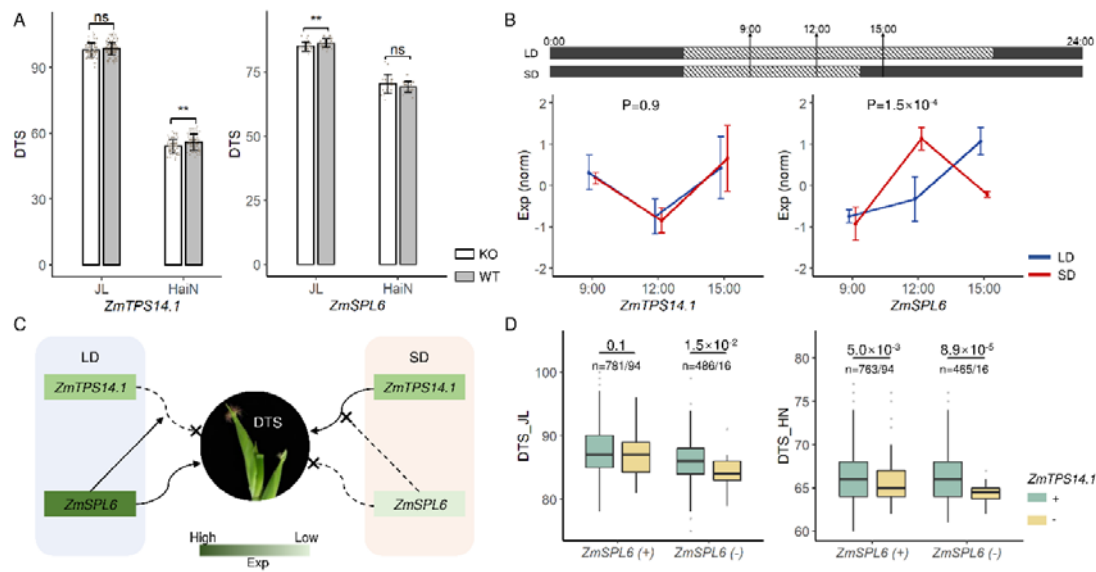

334

335 **Fig. 4 The interaction between *ZmTPS14.1* and *ZmSPL6* reveals the genetic basis of**  
 336 **phenotype plasticity of flowering time.** **A)** Phenotype (DTS; days to silking) of knock-out  
 337 lines and wild type of *ZmTPS14.1* and *ZmSPL6* at two field plantations, one plantation at JL  
 338 represents Jilin (N 43° 30', E 124° 49'), and another one at HaiN represents Hainan (N 18°  
 339 34', E 108° 43'). Error bars represent standard deviation. \*\* indicate P values < 0.01 by  
 340 Student's t-test. "ns" means no significance. **B)** The sampling diagram of the time-course  
 341 experiment in B73 under long-day (LD) and short-day (SD) conditions. The black area  
 342 represents dark time and the dotted-line area represents light time. Leaf tissues were  
 343 harvested at three time points (9:00, 3 hours of light; 12:00, 6 hours of light; 15:00, 9 hours of  
 344 light/ 1 hour of dark). The expression pattern of *ZmTPS14.1* and *ZmSPL6* at three time points  
 345 under the long-day condition (LD, blue) and the short-day condition (SD, red) were shown.  
 346 The y-axis represents gene expression, which was obtained from standardization of raw reads  
 347 counts then z-score normalization. Error bars represent standard error. **C)** The proposed  
 348 compensation interaction model between *ZmSPL6* and *ZmTPS14.1*. *ZmSPL6* expressed  
 349 highly in the long-day condition which could promote female flowering but its expression  
 350 suppressed in the short-day condition (SD) showed no effect for flowering. And the knockout  
 351 lines of *ZmTPS14.1* showed the flowering time difference in the short-day condition, but not  
 352 in the long-day condition because of the compensation effect of *ZmSPL6*. **D)** The phenotype  
 353 (DTS in JL and HN) comparison between two alleles of *ZmTPS14.1* (chromosome 8:  
 354 123,138,468 bp; C/C genotype → +; T/T genotype → -) in the different allele background of  
 355 *ZmSPL6* in LD (JL) and SD (HN) conditions (chromosome 3: 159,420,596 bp; G/G genotype  
 356 → +; T/T genotype → -). P-values were obtained by Student's t-test.

357

### 358 *Accounting for dynamics in genetic architecture improved complex traits prediction across* 359 *environments*

360 We evaluated the potential of integrating genetic diversity, environmental variation, and their  
 361 interaction in complex trait prediction by jointly modelling genotype, environment, and their  
 362 interaction (referred to as GEAI model, Materials and Methods). Two cross-validation  
 363 schemes were considered. In the first case, we explored the predictability on untested lines at

364 any of the five sites by using all the lines phenotyped at the five sites using 5-fold cross-  
365 validation. Compared with the GBLUP, with a universal prediction for all sites, our model  
366 not only provided site-specific predictions but also increased prediction accuracy for a  
367 majority of traits and sites (83.0% of all traits and sites; Table S9, Materials and methods).  
368 The averaged prediction accuracy for DTT, PH and EW increased by 5.3%, 1.2%, and 1.8%,  
369 respectively, and the increase in prediction accuracy was more pronounced at HN (increased  
370 by 15.5%, 3.8%, and 4.4% for DTT, PH, and EW, respectively, Fig. 5A-C).

371 In the second case, we explored a serial of more challenging designs, in which only a core set  
372 of lines (10%- 70%) were phenotyped across five sites and the interest was to predict the  
373 performance of unphenotyped lines at each site. It was very encouraging to see that our GEAI  
374 model showed higher accuracy for almost all the traits and sites. For example, at 10% overlap,  
375 our GEAI model outperformed GBLUP predictions ( $P = 4.0 \times 10^{-3}$ ) by 3.2% on average and  
376 increased the prediction accuracy at four out of five sites by 1.0%-12.7% for DTT, and the  
377 averaged accuracy was increased to 4.6%. At 70% overlap, the increase in accuracy at each  
378 site was larger than at 10% overlap (1.5%-13.5%; Fig. 5D-I). As the number of lines  
379 phenotyped at all sites increased from 10% to 70%, both the averaged accuracies and site-  
380 specific accuracies increased (Figure S8). Overall, our study highlighted the potential of  
381 intergrading QTL by environment interaction in understanding complex traits variation and  
382 predictions.

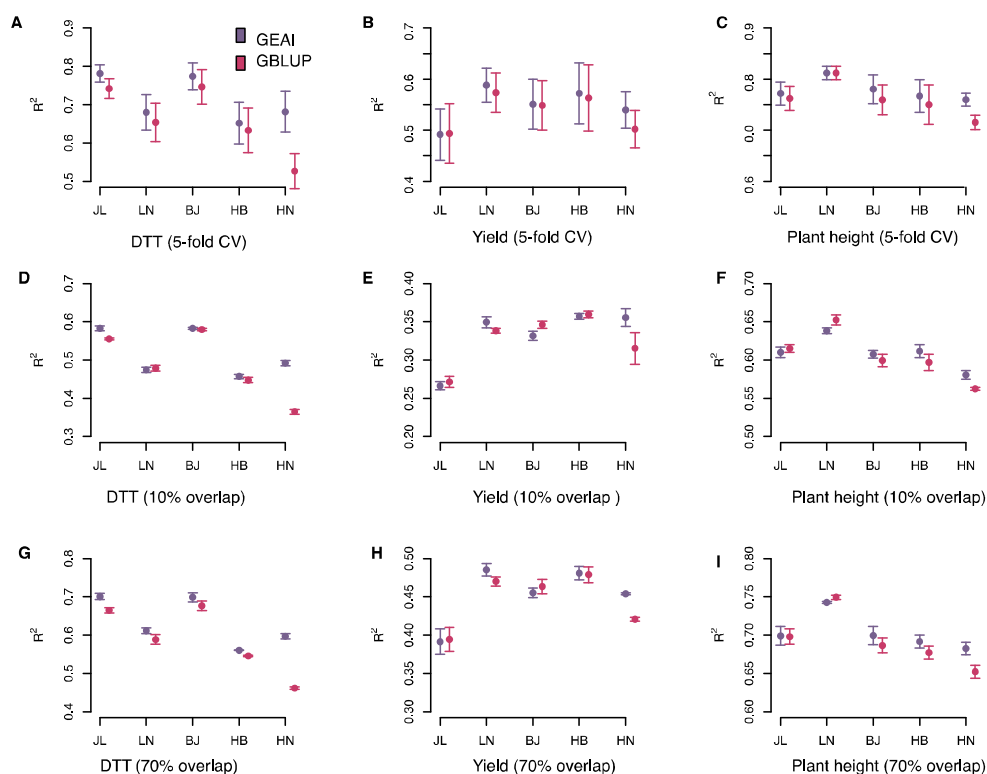

383

384 **Fig. 5 Performance of GEAI model in site-specific complex trait prediction.** A)  
 385 Predictability of untested lines at any of the five sites by using all the lines phenotyped across  
 386 the five sites as training data for A) DTT, B) EW, and C) PH. Prediction accuracy for  
 387 untested lines at any of the five sites for D) DTT, E) EW, and F) PH when 10% of the lines  
 388 were phenotyped at all five sites and remaining lines were only phenotyped at one of the five  
 389 sites. Prediction accuracy for G) DTT, H) EW, and I) PH when 70% of the lines were  
 390 phenotyped at all five sites and the remaining lines were only phenotyped at one of the five  
 391 sites.

392

### 393 Discussion

394 Here, by surveying the performance of a genetically diversified population across China's  
 395 summer maize major production zone, we were able to quantify contributions from specific  
 396 environmental factors to the variation of 23 complex traits, detect plastic QTLs, and provide  
 397 site-specific complex traits prediction model with higher accuracy.

### 398 *Contribution from environmental factors to maize complex traits mean variation and* 399 *plasticity variation*

400 Plants time their vegetative and reproductive growth in response to changes in seasonal cues,  
 401 such as winter temperatures (vernalization) and day length (photoperiod)<sup>38</sup>. Although many

402 studies have emphasized the importance of photoperiod to flowering time regulation, the  
403 temperature is a key determinant of flowering time<sup>39-41</sup>, and significantly stronger  
404 correlations between seasonal transcriptome and temperature than those with day length<sup>42</sup>  
405 were reported. In consistent with these reports, we found that TemH had a considerable high  
406 contribution to the across-environment variation of flowering traits, while very little  
407 contribution from TemD, DayL, G-by-TemH, or G-by-DayL were found. In contrast, yield  
408 traits were influenced by a combination of TemH, TemD, DayL, and their interactions with  
409 genotype. A possible explanation is that both photosynthesis and respiration losses, mainly  
410 determining the crop yields, are sensitive to temperature and day length<sup>43</sup>, and previous  
411 studies have shown that temperature and day length could also affect days to maturity, rate of  
412 yield accumulation, and harvest index<sup>44</sup>.

413 Unfortunately, soil conditions, such as pH, soil temperature, water, and nutrient content were  
414 not available in our study, limiting our ability to provide broader insight into the impact of  
415 specific environmental factors on complex trait variation. The genotype to field (G2F) Maize  
416 project<sup>45</sup>, one of the ongoing efforts aiming at compensatively surveying the environmental  
417 factors and performance of diversified population across a large number of field plantations,  
418 would be of great importance to characterise the role of specific soil factors on complex traits  
419 variation.

420 Here, we quantified phenotype plasticity as a response to changes between particular  
421 environment sites and across all five sites, resulting in multiple plasticity measures for the  
422 same genotype. Despite a high overall correlation among these plasticity measurements,  
423 different QTLs were detected, indicating that these measures captured different aspects of  
424 plasticity with complementary information. Such differences in quantifying phenotype  
425 plasticity may be highly relevant in applications where the testing site and targeted site are  
426 clearly defined. In particular, when the mechanism of environmental factors interacting with  
427 the plastic QTL is known, an accurate prediction could be made on germplasm performances  
428 under various deployment environments at the GenBank level, facilitating precise breeding  
429 designs in the future.

430 Among the 23 traits, yield traits were more plastic than other traits and involved larger  
431 contributions from both temperature and day length, as well as a larger proportion of G-by-E  
432 interaction. A similar result has been reported in D'Andrea et al (2013)<sup>46</sup>. A possible  
433 explanation could be that yield traits were the results of combined effects from vegetative and  
434 reproductive growth with demonstrated contribution from both temperature and



435 photoperiod<sup>43,44</sup> that likely to be equally important, while flowering time was predominantly  
436 regulated by temperature<sup>42</sup> with a relatively smaller contribution from photoperiod. Future  
437 studies are required to explore how differences in genetic architecture among traits cause  
438 such differences in phenotypic plasticity.

#### 439 ***The genetic architectures underlying trait mean and plasticity***

440 In consistent with previous studies<sup>25,47</sup>, we found partial overlaps between QTLs associated  
441 with trait mean and plasticity. However, our interpretation is that when treating phenotype  
442 plasticity as a measure of change for one polygenic trait across environments, such overlap is  
443 expected. Besides this, we also expect that i) plasticity is polygenic as a result of the  
444 polygenic architecture for the trait itself at different environments, ii) the degree of overlap  
445 between QTLs underlying trait mean and plasticity may vary across studies due to detection  
446 power, and iii) QTLs with altered genetic effect among environments are more likely to  
447 impact the variability of plasticity. Taking DTT as an example, we detected 7 loci for DTT  
448 mean and 9 loci for DTT plasticity with four loci overlapping. The magnitude change  
449 (chromosome 5: 6,462,711 bp) or the sign change (chromosome 9: 35,126,793 bp) of QTL  
450 effects resulted in variability in DTT plasticity, providing support for the allelic sensitivity  
451 model<sup>48</sup>. Even though we did not detect the chromosome 9 QTL in DTT mean scan at a  
452 genome-wide significance, a moderate association was found at a lower significance  
453 threshold. In line with this, when aggregating the allelic effects of mean or plasticity QTLs  
454 not detectable at genome-wide significance, we found, as a group, they were significantly  
455 contributing to the variation of both mean and plasticity measurements (Figure S9, Table  
456 S10). Given the polygenic and dynamic genetic architecture of trait mean across  
457 environments reported here and in previous research<sup>30,49</sup>, there might be a tighter connection  
458 between the genetic regulation of trait mean and plastic than we have previously  
459 acknowledged.

#### 460 ***Plasticity QTL may have been subjected to directional selection during the breeding*** 461 ***program***

462 Previous studies showed that the highly selected region during maize adaptation to temperate  
463 climate explained less G-by-E variation than the selected region<sup>12</sup> and the allele frequency of  
464 plasticity QTLs were changed between temperate and tropical lines<sup>27</sup>, suggesting that  
465 directional selection may have shaped their genetic diversity. Here, we explored whether the  
466 93 plasticity QTLs were selected during intense artificial selection by evaluating their allele  
467 frequency changes using two collections of breeding materials, one collection from China

468 that has predominantly been deployed in the 1960s, 1980s, and early 2000s, and a second  
469 collection from US before and after 2003<sup>50</sup>. We found that the allelic frequencies of 42 (45%)  
470 plasticity QTLs consistently changed from 1960s to 1980s and from 1980s to early 2000 in  
471 Chinese collection, and before and after 2003 in US collection (Figure S10). Such an  
472 agreement indicates that it is likely that these plastic QTLs were subjected to selection rather  
473 than genetic drift. However, many plastic QTLs, found here or in earlier researches<sup>24,25</sup>, were  
474 also contributing to the trait mean, further studies would be required to explore whether such  
475 changes are results of directional selection or simply consequences of selection on the trait  
476 mean that is correlated with the plasticity.

#### 477 *Fine mapping the QTLs and the molecular basis of variation in phenotype plasticity*

478 We found that a few QTL peaks, such as the QTL on chromosome 5: 6-7 Mb (Fig. 3A;  
479 Figure S4) and chromosome 8: 123-130 Mb (Fig. 3A; Figure S6) simultaneously associated  
480 with multiple traits means and plasticity measurements, possibly being a consequence of  
481 extended linkage disequilibrium (LD). Fine mapping the causal variants underlying each trait  
482 mean and plasticity QTL and distinguishing whether these signals were tagging one common  
483 signal simultaneously associated with multiple trait means and plasticity measures or they  
484 were multiple variants each associated with one measure but in tight LD with each other is a  
485 daunting task. Even though detailed analysis (Supplementary note) showed that a large  
486 proportion of the SNPs were tagging the same causal variants (Figure S4, S6), there seemed  
487 to be multiple independent association signals underlying the same QTL (Figure S4, S6) for a  
488 few mean or plasticity measures. For example, a detailed exploration on the chromosome 5  
489 QTL showed that multiple statistical independent SNPs were tagging different combinations  
490 of multiple functional haplotypes (Figure S4), illustrating a complex genetic architecture  
491 involving allelic heterogeneity, multi-allelic, pleiotropy, and genotype by environment  
492 interaction at the same time. To pinpoint the causal genes in presence of such complexity, we  
493 applied gene-based test<sup>51</sup> aggregating summary statistics on SNPs up/down stream of the  
494 annotated protein-coding genes, and detected 300 genes (Table S11), among which 24% were  
495 simultaneously associated with both mean and plasticity measurements (106 for mean, 122  
496 for plasticity, 72 for both). Among these genes, the maize FT gene *ZCN8* was detected in  
497 both means and plasticity of flowering traits, while *ZCN18* was only associated with STI  
498 plasticity<sup>52</sup>. A benzoxazinone synthesis gene cluster including *bx1/2/3/8* on chromosome 4  
499 was detected with association to the mean of ELW. Similar conditional effects also had been  
500 found in mutant and overexpression of multiple flowering genes in *Arabidopsis*, such as

501 *PRR3* in circadian clock<sup>53</sup>, *PIF4* in ambient temperature pathway<sup>54</sup>, and *HXK1* in sugar  
502 pathway<sup>55</sup>. Although future experimental validations are required to validate the biological  
503 mechanism underlying such variation, the validation of two candidate genes in our study  
504 suggests that the effect of genes on complex traits may in general be context-dependent.

## 505 **Conclusion**

506 In summary, we showed that the genetic architectures of maize agronomic traits were  
507 dynamic across China's major summer maize production zone with the genetic effects of  
508 many QTLs being either local or regional due to interaction with environmental factors,  
509 leading to changes in additive genetic variance, narrow sense heritability and variation in  
510 phenotype plasticity. The dynamic allelic effects of plasticity QTLs enable us to develop a  
511 GEAI complex trait prediction model with site-specific predictions and higher accuracy,  
512 opening a new possibility for future crop improvement. Our study thus provided novel  
513 insights into the dynamic genetic architectures of agronomic traits in response to changing  
514 climate and provided a GEAI model with site-specific prediction, paving a practical route to  
515 precision agriculture.

516

## 517 **Materials and methods**

### 518 *Experimental design*

519 We developed a Complete-diallel plus Unbalanced Breeding-derived Inter-Cross (CUBIC)  
520 population of 1404 maize inbred lines and surveyed their performance for 23 agronomic traits  
521 at five sites in China's major maize production zone with longitudinal variation from E 114°  
522 01' at Henan (HN) to E 125° 18' at Jilin (JL) and latitudinal variation from N 43° 42' at HN to  
523 N 35° 27' at HN. A detailed description of the development of this population was available  
524 in Liu et al<sup>29</sup>. Briefly, these inbred lines were derived from 24 elites representing 4 divergent  
525 heterotic groups with cycles of random mating, selection, and inbreeding<sup>29</sup>. In 2014, all  
526 inbred lines, each with five replicates, were planted at five sites, including Jilin Province (JL,  
527 N 43° 42', E 125° 18'), Liaoning Province (LN; N 42° 03', E 123° 33'), Beijing (BJ; N 40°  
528 10', E 116° 21'), Hebei Province (HB, N 38° 39', E 115° 51') and Henan Province (HN; N 35°  
529 27', E 114° 01'). Twenty-three agronomic traits, including 6 phenology traits, 8 plant  
530 architecture traits, and 9 yield traits were phenotypically evaluated. Except for six flowering  
531 traits that were scored as the median values of replicated lines, all the remaining traits were  
532 scored as the means among replicates (Table S12). Three environmental variables, including

533 daily highest temperature (TemH), daily temperature difference (TemD), and day length  
534 (DayL), were extracted from local weather stations  
535 (<http://data.sheshiyuanyi.com/WeatherData/>). All the 1404 lines were re-sequenced and  
536 called genotypes were available for download from Liu et al<sup>29</sup>. Totally 6.6 M SNPs with  
537 MAF > 0.03 and LD =< 0.9 in 100 kb sliding window were retained for downstream analysis.

### 538 ***Partition the phenotypic variance into contributions from genotype, environment factors,*** 539 ***and their interactions***

540 The phenotypic variance was partitioned into contributions from genotype (G), genotype-by-  
541 environment (G-by-E), and residual (environment; E) by fitting the following model:

$$542 \bar{y}_{ij} = u + id_i + \text{TemH}_j + \text{TemD}_j + \text{DayL}_j + id_i * \text{TemH}_j + id_i * \text{TemD}_j + id_i * \text{DayL}_j + e_{ij} \quad (1)$$

543 This model was fitted for each of the 23 traits one at a time.  $\bar{y}_{ij}$  is the trait mean/median of  
544 individual i (i= 1...n, n = 1404 is the number of individuals) at site j (j = 1...q; q=5,  
545 corresponds to the number of sites);  $id_i$  is the line id (genotype) coded as factor;  
546  $\text{TemH}_j$ ,  $\text{TemD}_j$  and  $\text{DayL}_j$  are three environmental variables representing the daily highest  
547 temperature, daily temperature difference, and day length at site j, respectively. These  
548 environmental factors were coded as numeric, assuming a linear relationship with the  
549 phenotypic measurements.  $id_i * \text{TemH}_j$ ,  $id_i * \text{TemD}_j$ , and  $id_i * \text{DayL}_j$  are the interaction terms  
550 (G-by-E) between a particular line (genotype) and the corresponding environmental factors  
551 (environment). The relative contributions to the total phenotypic variance from G and G-by-E  
552 were estimated by their respective sum of squares (Sum of Square for id is calculated as  
553  $\sum_1^p (id_i - \bar{id})^2$  and Sum of Square for the interaction terms  $id * E$  are calculated as  $\sum_1^n (id_i * E_j - \bar{id}_i * \bar{E}_j)^2$ ), where E stands for TemH, TemD, and DayL.

### 555 ***Estimating the narrow-sense heritability, additive variance, and genetic correlations***

556 A linear model was used to estimate the narrow-sense heritability for all the 23 traits  
557 measured at each of the five sites.

$$558 \bar{Y} = \mu + Zu + e \quad (2)$$

559 Here,  $\bar{Y}$  is a vector of trait mean/median of each individual (genotype) at each tested site.  $e$  is  
560 the normally distributed residual.  $\mu$  is a column vector of 1's to represent the population  
561 mean, and  $u$  is a random effect vector of the breeding values for the 1404 individuals.  $Z$  is the  
562 corresponding design matrix obtained from a Cholesky decomposition of the kinship matrix  
563  $G$ , estimated using the genome-wide markers using GCTA<sup>56</sup>. The  $Z$  matrix satisfies  $ZZ'=G$ ,

564 therefore, that is normally distributed ( $u \sim N(0, I\sigma_g^2)$ ).  $e$  is the residual variance with  $e \sim N(0,$   
565  $I\sigma_e^2)$ . The narrow-sense heritability of fitted phenotype was calculated as the intraclass  
566 correlation  $h^2 = \sigma_g^2 / (\sigma_g^2 + \sigma_e^2)$ . AI-REML implemented in GCTA was used to obtain these  
567 estimates<sup>56</sup>. The additive genetic variance was then estimated as the variance of  $Y$  ( $\text{Var}_Y$ )  
568 times  $h^2$ .

569 Similarly, a bivariate mixed model was fitted to obtain estimates of the genetic correlation  
570 between measurements obtained from two individual sites. Ten models were thus fitted to  
571 obtain all the pairwise genetic correlations among five sites.  $\bar{Y}$ ,  $\mu$  and  $u$  from the model (2)  
572 were updated to an  $n \times 2$  matrix, with  $n$  being the number of individuals and each column  
573 vector representing measurement obtained from a particular site. This model was fitted using  
574 the *reml-bivar* module<sup>57</sup> implemented in the GCTA software<sup>56</sup> and details of this model were  
575 available in Lee et al<sup>57</sup>.

#### 576 ***Quantification of the phenotypic plasticity for the 23 agronomic traits***

577 Since all the 1404 maize lines were phenotyped for 23 agronomic traits across five sites, we  
578 quantified and studied the genetics of maize complex trait plasticity in response to  
579 longitudinal and latitudinal environmental variation. Here, the phenotypic plasticity was  
580 classified into two categories (Figure S2B-E). The first category is overall plasticity  
581 describing plasticity across all the studied environments, while the second category-specific  
582 plasticity is more unique to certain pairs of sites, which only captures the plasticity across  
583 two environments. The motivation underlying such classification is that some individuals are  
584 more robust across most of the studied sites except only one or a few sites, while other  
585 individuals are plastic among most of the sites.

586 One metric, pairwise difference in phenotypic value between two sites, was used to quantify  
587 the specific plasticity (Figure S2A). Using DTT measured at JL and HN as an example, the  
588 differences in measured DTT values for all individuals ( $DIFF_{DTT}^{JL-HN} = DTT_{JL} - DTT_{HN}$ ) would  
589 describe the specific plasticity between HN and BJ (Figure S2B)<sup>31</sup>. In addition, four  
590 additional approaches were used to quantify the overall plasticity (Figure S2C-E). First, the  
591 principal component analysis (PCA) was used to quantify the overall plasticity. The influence  
592 of the phenotype measures at individual sites on the principal components (PCs) can be  
593 captured in the loadings<sup>58</sup> (Figure S2C). As the second PC (PC2) captures more variation in  
594 overall plasticity, we consider PC2 as a measure for overall phenotypic plasticity. Second, the  
595 across environment variance (VAR) of the rank transformed phenotype proposed in Vanous

596 et al., 2019 was used (Figure S2D), and the coefficient of variance (CV)<sup>7</sup> was also used to  
597 account for the mean difference. The fourth score for the overall plasticity (FWR) applies  
598 Finlay–Wilkinson Regression<sup>32,59</sup> to partition the phenotype into two components, one is  
599 constant across environments and another responds dynamically to environmental changes.  
600 Using the linear mixed model, the phenotype of each line is partitioned into these two  
601 components and the plasticity component is used as a measurement of plasticity. In total, the  
602 described approaches resulted in 14 measurements of phenotypic plasticity (abbreviated as  
603 DIFF, PCA, VarR, CV, and FWR). Altogether, these three metrics yield 14 plasticity  
604 measurements for each trait.

### 605 ***Genome-wide association analysis for the trait mean/median and plasticity measurements***

606 To detect genetic polymorphisms underlying variation of agronomic trait mean and plasticity,  
607 we fitted the following linear mixed model:

$$608 Y = \mu + X\beta + Zu + e \quad (3)$$

609 where  $Y$ ,  $\mu$ ,  $Z$ ,  $u$ , and  $e$  are the same as has been defined in the model (1).  $X$  is a matrix  
610 containing the genotype of the tested SNP (coded as 0/2 for minor/major-allele homozygous  
611 genotypes, respectively).  $\beta$  is a vector including the estimated additive allele-substitution  
612 effect for the tested SNP. First, a genome-wide analysis (GWA) across all genotyped SNPs  
613 was conducted using GEMMA<sup>60</sup>. A subsequent conditional analysis was performed where all  
614 the top associated SNPs (the SNPs with the highest P value from each association QTL from  
615 the initial GWA scan) were included as covariates in the design matrix  $X$  to screen for  
616 additional association signals. This conditional analysis was repeated until no more SNPs  
617 were above the significance threshold. This conditional analysis was implemented in *cojo*  
618 module from GCTA<sup>61</sup>. The linkage disequilibrium (LD) was high in this population, making  
619 Bonferroni correction assuming all tested markers were statistically independent too  
620 conservative. Therefore, we estimated the effective number of independent markers ( $Me$ )<sup>62</sup>  
621 and derived a less conservative genome-wide significance threshold following  $0.05/Me$  ( $1.53$   
622  $\times 10^{-8}$  equivalent to  $-\text{Log}_{10}P = 7.81$ ).

### 623 ***Colonization test separates linkage from pleiotropy at regions where multiple signals were*** 624 ***associated with multiple traits***

625 At the same genomic region, multiple association signals, each associated with one or  
626 multiple traits, were colocalized. Since the level of LD between the lead SNPs is very low,  
627 we could not directly tell whether multiple independent signals, detected in multiple scans

628 and physically close to each other, are from one association signal simultaneously associated  
629 with multiple scans (pleiotropy), or multiple associations each associated with one scan but in  
630 tight LD with each other. To distinguish this, we performed a multi-trait colocalization  
631 analysis (Supplementary note). This method estimates a posterior probability of whether  
632 multiple traits are sharing a common causal variant using summaries statistics from each  
633 trait<sup>63,64</sup>. We first binned the genome into 1 Mb bins. Scans with independent SNPs that fall  
634 into consecutive bins were aggregated and tested for colocalization using the *hyprcoloc* R  
635 package<sup>63,64</sup>. Given the complex population history (multi-parental) and a limited number of  
636 recombinations, some of the statistically independent SNPs were very close to each other. To  
637 make a comparison among the 4 types of measurements, we arbitrarily grouped SNPs less  
638 than 1Mb to a single QTL.

### 639 ***Gene-based test to prioritise candidate genes***

640 The LD was too extensive to directly pinpoint the genes underlying the associated loci. We,  
641 therefore, applied a set-based analysis that aggregates summary statistics from all the variants  
642 50 kb up/downstream of the tested gene to obtain one p value to represent the significance of  
643 a particular gene. The summary association statistics, including effect sizes, standard errors,  
644 minor allele frequencies, and sample size, were first extracted from the GEMMA association  
645 output, and subsequently inputted to *fastBAT* module in GCTA<sup>65</sup>. And 39,155 genes,  
646 annotated in the B73 reference genome version 3 were used to bin the summary statistics to  
647 perform the set analysis<sup>51</sup>.

### 648 ***Testing for genotype by environment interaction of detected QTLs***

649 We tested the interaction between QTLs associated with each of the 23 traits in at least one of  
650 the five sites, one QTL and one trait at a time. This was done by fitting the model below:

$$651 \bar{y}_{ij} = u + id_i + site_j + QTL_i + e_{ij} \quad (4)$$

$$652 \bar{y}_{ij} = u + id_i + site_j + QTL_i * site_j + e_{ij} \quad (5)$$

653 This model was fitted for each of the 23 traits one at a time.  $\bar{y}_{ij}$  is the trait mean/median of  
654 individual  $i$  ( $i = 1 \dots n$ ,  $n = 1404$ , number of individuals) at site  $j$  ( $j = 1 \dots q$ ;  $q=5$ , corresponds to  
655 the number of sites);  $id_i$  is the line id (genotype) coded as a factor;  $site_j$  is a vector of  
656 characters representing the site where the measurements were made.  $QTL_i$  is the genotype of  
657  $id_i$  at the testing QTL, and  $QTL_i * site_j$  is the interaction terms (G-by-E) between a particular  
658 QTL and the sites (environments). A likelihood ratio test comparing the model with (Model 4)

659 and without (Model 5) the interaction between sites was performed to calculate p values. The  
660 significance threshold was derived as 0.05 dividing the number of tests ( $0.05/143= 3.49 \times 10^{-4}$ ).  
661

### 662 *Experimental validation of maize flowering genes*

663 Knock-out lines of *ZmTPS14.1* and *ZmSPL6* were generated using a high-throughput  
664 genome-editing system<sup>35</sup>. In brief, line-specific sgRNAs were filtered based on assembled  
665 pseudo-genome of the receptor KN5585. The Double sgRNAs pool (DSP) approach was used  
666 to construct vectors. The vectors were transformed into the receptor KN5585. The genotype  
667 of gene-editing lines was identified by PCR amplification and Sanger sequencing using  
668 target-specific primers (Table S13). The phenotype of knock-out lines and wild type were  
669 investigated in Jilin (Gongzhuling, Jilin province, N 43° 30', E 124° 49') and Hainan (Sanya,  
670 Hainan Province, N 18° 34', E 108° 43').

### 671 *Time-course transcriptome*

672 B73 seeds were planted at two conditions, long-day condition (14 hours light and 10 hours  
673 dark) and short-day condition (8 hours light and 16 hours dark). Leaf tissues were harvested  
674 at 3 time points in one day at stage V4 (Vegetative 4, four fully extended leaves). Eighteen  
675 samples (2 conditions  $\times$  3 time points  $\times$  3 replicates) were RNA-sequenced by Hiseq3000.  
676 Low-quality reads were filtered out by trimmomatic<sup>66</sup>. STAR<sup>67</sup> was used to align the RNA-  
677 seq reads to the reference genome. HTSeq<sup>68</sup> was used to obtain gene-level counts from the  
678 resulting BAM files. Genes with significant expression changes were detected by  
679 ImpulseDE2<sup>69</sup>.

### 680 *Estimating the contribution from mean and plasticity QTLs to the variation of mean and* 681 *plasticity measurements*

682 We quantified the contribution from mean and plasticity QTLs to the variation of trait mean  
683 and plasticity by fitting the following models.

$$684 Y = X_1\beta_1 + X_2\beta_2 + Zu + e \quad (6)$$

685 Here, Y is a vector of length n (n =1404), representing the trait mean or plasticity  
686 measurement. The joint contributions from mean and plasticity QTLs were modelled in  $X_1\beta_1$   
687 and  $X_2\beta_2$  where  $X_1$  and  $X_2$  are the design matrixes  $\beta_1$  and  $\beta_2$  are the corresponding effect  
688 sizes. Z, u and e is the same as defined in model 3. Contributions from mean and plasticity

689 QTL were then calculated with  $\text{Var}_m = \frac{\text{var}(X_1\beta_1)}{\text{var}(y)}$  and  $\text{Var}_p = \frac{\text{var}(X_2\beta_2)}{\text{var}(y)}$ .



## 690 *Forecasting the site-specific performance of the 23 traits*

691 We fitted the following model to predict the performance of each site for the 23 traits one at a  
692 time.

$$693 Y = X_1\beta_1 + Zu + e \quad (7)$$

$$694 Y = X_2\beta_2 + Zu + e \quad (8)$$

695 Here,  $Y$  is a vector of length  $n \times p$  ( $n = 1404$ , the number of individuals;  $p = 5$ , the number of  
696 sites;  $n \times p = 7020$ ), representing the trait means measured at five sites.  $u$  is a vector of length  
697  $n \times p$ , representing the breeding value of the  $n$  maize line, and  $e$  is the randomly distributed  
698 residual with length  $n \times p$ . The  $Z$  matrix satisfies  $ZZ' = G \otimes I$ , where  $G$  is the identity by state  
699 (IBS) matrix and  $I$  is a diagonal matrix of  $p \times p$ .  $X_1$  is a design matrix with one column of 1  
700 representing column mean and additional 4 columns representing the environmental effects  
701 from the remaining 4 sites, and  $\beta_1$  is a vector of corresponding effect sizes.  $X_2$  includes all  
702 the columns from  $X_1$  and additional columns with genotypes of the  $k$  QTL associated with  
703 the mean and plasticity measures of the tested trait, and additional columns representing the  
704 interaction between the  $k$  QTL and the five sites, capturing the effects from QTL by  
705 environment factor interaction. The fitted values from model 7 were referred to as GBLUP  
706 predictions while the fitted values from model 8 were referred to as GEAI predictions. These  
707 models were fitted using rrBLUP<sup>70</sup> package in R (<https://www.R-project.org/>). In the first  
708 case, we evaluated the predictability on untested lines at any of the five sites by using all the  
709 lines phenotyped across the five sites using 5-fold cross-validation. Each time, 80% of the  
710 lines were randomly sampled and used to predict the remaining 20% lines. In the second  
711 case, we simulated a serial of more challenging breeding designs, in which only a core set of  
712 lines (10% - 70%) were phenotyped across five sites and the interest was to predict the  
713 performance of unphenotyped lines at each site. Each time, a core set of lines were randomly  
714 sampled and the remaining lines were divided into 4 sets and were randomly assigned to one  
715 of the remaining 4 sites, whose phenotypes were masked as NA and unassigned  
716 environments. Accuracies were estimated as the regression  $r^2$  between measured and  
717 predicted phenotypes.

718

## 719 **Supplementary materials**

720 Figure S1-S10, Table S1-S13, and note were available in supplementary files

721

## 722 **Author Contributions**

723 Conceptualization, J.Y., M.J., Y.Z., H.L.; methodology, Y.Z., M.J., H.L.; formal analysis,  
724 Y.Z., M.J.; investigation, Y.Z., M.J., H.L.; data collection and curation, X.L., J.G., Y.Y., Z.L.,  
725 J.Z., X.W., F.Q., M.J., Y.Z., H.L.; writing original draft preparation, Y.Z., M.J.; writing  
726 reviewing and editing, M.J., Y.Z., H.L., T.G., Y.X., J.Y.; visualization, Y.Z., M.J, Y.J;  
727 supervision, J.Y.; funding acquisition, J.Y., Y.Z., H.L., X.L. All authors have read and agreed  
728 to the published current version of the manuscript.

729

730 **The authors have no conflicts of interest to declare.**

731

## 732 **Funding**

733 This research was funded by the Natural Science Foundation of China (31961133002,  
734 31901553, 31771879), the National Key Research and Development Program of China  
735 (2020YFE0202300), the Swedish Research Council for Environment, Agricultural Sciences  
736 and Spatial Planning to Y.Z. (2019-01600), and the Jilin Scientific and Technological  
737 Development Program (20190201290JC).

738

## 739 **Acknowledgments**

740 We would like to thank the Swedish National Infrastructure for Computing (SNIC) for their  
741 support in computation resources through High Performance Computing Centre North  
742 (HPC2N, SNIC 2020/9-117) and the Uppsala Multidisciplinary Centre for Advanced  
743 Computational Science (UPPMAX).

744

## 745 **Reference**

- 746 1. Sultan, S.E. Phenotypic plasticity for plant development, function and life history.  
747 *Trends Plant Sci.* **5**, 537–42 (2000).  
748 2. Nicotra, A.B. et al. Plant phenotypic plasticity in a changing climate. *Trends Plant Sci.*  
749 **15**, 684–92 (2010).

- 750 3. Assmann, S.M. Natural variation in abiotic stress and climate change responses in  
751 Arabidopsis: implications for Twenty-first-century agriculture. *Int J Plant Sci.* **174**, 3–26  
752 (2013).
- 753 4. El-Soda, M., Malosetti, M., Zwaan, B.J., Koornneef, M. & Aarts, M.G.M. Genotype ×  
754 environment interaction QTL mapping in plants: lessons from Arabidopsis. *Trends Plant*  
755 *Sci.* **19**, 390–8 (2014).
- 756 5. Sasaki, E., Zhang, P., Atwell, S., Meng, D. & Nordborg, M. "Missing" G × E variation  
757 controls flowering time in Arabidopsis thaliana. *PLoS Genet.* **11**, e1005597 (2015).
- 758 6. Schneider, J.R., Chadee, D.D., Mori, A., Romero-Severson, J. & Severson, D.W.  
759 Heritability and adaptive phenotypic plasticity of adult body size in the mosquito *Aedes*  
760 *aegypti* with implications for dengue vector competence. *Infect Genet Evol.* **11**, 11–6  
761 (2011).
- 762 7. Vanous, A. et al. Stability analysis of kernel quality traits in exotic-derived doubled  
763 haploid maize lines. *Plant Genome.* **12**, 1–14 (2019).
- 764 8. Mangin, B. et al. Genetic control of plasticity of oil yield for combined abiotic stresses  
765 using a joint approach of crop modelling and genome-wide association. *Plant Cell*  
766 *Environ.* **40**, 2276–91 (2017).
- 767 9. Pigliucci, M. Evolution of phenotypic plasticity: where are we going now? *Trends Ecol*  
768 *Evol.* **20**, 481–6 (2005).
- 769 10. Kang, M.S. Using genotype-by-environment interaction for crop cultivar development.  
770 *Adv Agron.* **62**, 199–252 (1997).
- 771 11. Kusmec, A., de Leon, N. & Schnable, P.S. Harnessing phenotypic plasticity to improve  
772 maize yields. *Front Plant Sci.* **9**, 1377 (2018).
- 773 12. Gage, J.L. et al. The effect of artificial selection on phenotypic plasticity in maize. *Nat*  
774 *Commun.* **8**, 1348 (2017).
- 775 13. Lynch, M. & Walsh, B. Genetics and analysis of quantitative traits. *Sinauer Assoc.* **1** Ed,  
776 980p (1998).
- 777 14. Jannink, J-L., Lorenz, A.J. & Iwata, H. Genomic selection in plant breeding: from theory  
778 to practice. *Brief Funct Genomics.* **9**, 166–77 (2010).
- 779 15. Blanquart, F., Kaltz, O., Nuismer, S.L. & Gandon, S. A practical guide to measuring  
780 local adaptation. *Ecol Lett.* **16**, 1195–205 (2013).
- 781 16. Hereford, J. A quantitative survey of local adaptation and fitness trade-offs. *Am Nat.* **173**,  
782 579–88 (2009).

- 783 17. Anderson, J.T., Lee, C-R., Rushworth, C.A., Colautti, R.I. & Mitchell-Olds, T. Genetic  
784 trade-offs and conditional neutrality contribute to local adaptation. *Mol Ecol.* **22**, 699–  
785 708 (2013).
- 786 18. Lazzaro, B.P., Flores, H.A., Lorigan, J.G. & Yourth, C.P. Genotype-by-environment  
787 interactions and adaptation to local temperature affect immunity and fecundity in  
788 *Drosophila melanogaster*. *PLoS Pathog.* **4**, e1000025 (2008).
- 789 19. Malosetti, M., Ribaut, J-M. & van Eeuwijk, F.A. The statistical analysis of multi-  
790 environment data: modeling genotype-by-environment interaction and its genetic basis.  
791 *Front Physiol.* **4**, 44 (2013).
- 792 20. Finlay, K. & Wilkinson, G. The analysis of adaptation in a plant-breeding programme.  
793 *Aust J Agric Res.* **14**, 742–754 (1963).
- 794 21. Gollob, H.F. A statistical model which combines features of factor analytic and analysis  
795 of variance techniques. *Psychometrika.* **33**, 73–115 (1968).
- 796 22. Jiang, C. & Zeng, Z.B. Multiple trait analysis of genetic mapping for quantitative trait  
797 loci. *Genetics.* **140**, 1111–27 (1995).
- 798 23. Rauw, W.M. & Gomez-Raya, L. Genotype by environment interaction and breeding for  
799 robustness in livestock. *Front Genet.* **6**, 310 (2015).
- 800 24. Kusmec, A., Srinivasan, S., Nettleton, D. & Schnable, P.S. Distinct genetic architectures  
801 for phenotype means and plasticities in *Zea mays*. *Nat plants.* **3**, 715–23 (2017).
- 802 25. Li, C. et al. Genetic architecture of phenotypic means and plasticities of kernel size and  
803 weight in maize. *Theor Appl Genet.* **132**, 3309–20 (2019).
- 804 26. Schneider, H.M. et al. Genetic control of root architectural plasticity in maize. *J Exp Bot.*  
805 **71**, 3185–97 (2020).
- 806 27. Liu, N., Du, Y., Warburton, M.L., Xiao, Y. & Yan, J. Phenotypic plasticity contributes to  
807 maize adaptation and heterosis. *Mol Biol Evol.* **38**, 1262–75 (2021).
- 808 28. Li, X., Guo, T., Mu, Q., Li, X. & Yu, J. Genomic and environmental determinants and  
809 their interplay underlying phenotypic plasticity. *Proc Natl Acad Sci U S A.* **115**, 6679–84  
810 (2018).
- 811 29. Liu, H-J. et al. CUBIC: an atlas of genetic architecture promises directed maize  
812 improvement. *Genome Biol.* **21**, 20 (2020).
- 813 30. Zan, Y. & Carlborg, Ö. Dissecting the genetic regulation of yeast growth plasticity in  
814 response to environmental changes. *Genes (Basel).* **11**, 1279 (2020).

- 815 31. Ungerer, M.C., Halldorsdottir, S.S., Purugganan, M.D. & Mackay, T.F.C. Genotype-  
816 environment interactions at quantitative trait loci affecting inflorescence development in  
817 *Arabidopsis thaliana*. *Genetics*. **165**, 353–65 (2003).
- 818 32. Lian, L. & de Los Campos, G. FW: An R package for Finlay-Wilkinson regression that  
819 incorporates genomic/pedigree information and covariance structures between  
820 environments. *G3 (Bethesda)*. **6**, 589–97 (2015).
- 821 33. Balasubramanian, S. et al. The PHYTOCHROME C photoreceptor gene mediates natural  
822 variation in flowering and growth responses of *Arabidopsis thaliana*. *Nat Genet*. **38**, 711–  
823 5 (2006).
- 824 34. Kim, S.Y., Yu, X. & Michaels, S.D. Regulation of CONSTANS and FLOWERING  
825 LOCUS T expression in response to changing light quality. *Plant Physiol*. **148**, 269–79  
826 (2008).
- 827 35. Liu, H.-J. et al. High-throughput CRISPR/Cas9 mutagenesis streamlines trait gene  
828 identification in maize. *Plant Cell*. **32**, 1397–413 (2020).
- 829 36. Sommer, R.J. Phenotypic plasticity: from theory and genetics to current and future  
830 challenges. *Genetics*. **215**, 1–13 (2020).
- 831 37. Tsai, A. Y.-L. & Gazzarrini, S. Trehalose-6-phosphate and SnRK1 kinases in plant  
832 development and signaling: the emerging picture. *Front Plant Sci*. **5**, 119 (2014).
- 833 38. Andrés, F. & Coupland, G. The genetic basis of flowering responses to seasonal cues.  
834 *Nat Rev Genet*. **13**, 627–39 (2012).
- 835 39. Fitter, A.H. & Fitter, R.S.R. Rapid changes in flowering time in British plants. *Science*.  
836 **296**, 1689–91 (2002).
- 837 40. Blázquez, M.A., Ahn, J.H. & Weigel, D. A thermosensory pathway controlling flowering  
838 time in *Arabidopsis thaliana*. *Nat Genet*. **33**, 168–71 (2003).
- 839 41. Li, X. et al. An integrated framework reinstating the environmental dimension for  
840 GWAS and genomic selection in crops. *Mol Plant*. **14**, 874–87 (2021).
- 841 42. Nagano, A.J. et al. Annual transcriptome dynamics in natural environments reveals plant  
842 seasonal adaptation. *Nat Plants*. **5**, 74–83 (2019).
- 843 43. Yoshida, S. Fundamentals of rice crop science. *IRRI*, Los Baños, Philippines, p. 269  
844 (1981).
- 845 44. Wallace, D.H., Zobel, R.W. & Yourstone, K.S. A whole-system reconsideration of  
846 paradigms about photoperiod and temperature control of crop yield. *Theor Appl Genet*.  
847 **86**, 17–26 (1993).

- 848 45. McFarland, B.A. et al. Maize genomes to fields (G2F): 2014-2017 field seasons:  
849 genotype, phenotype, climatic, soil, and inbred ear image datasets. *BMC Res Notes*. **13**,  
850 71 (2020).
- 851 46. D’Andrea, K.E., Otegui, M.E., Cirilo, A.G. & Eyherabide, G.H. Parent–progeny  
852 relationships between maize inbreds and hybrids: analysis of grain yield and its  
853 determinants for contrasting soil nitrogen conditions. *Crop Sci*. **53**, 2147–61 (2013).
- 854 47. Prado, S.A., Sadras, V.O. & Borrás, L. Independent genetic control of maize (*Zea mays*  
855 L.) kernel weight determination and its phenotypic plasticity. *J Exp Bot*. **65**, 4479–87  
856 (2014).
- 857 48. Des Marais, D.L., Hernandez, K.M. & Juenger, T.E. Genotype-by-environment  
858 interaction and plasticity: exploring genomic responses of plants to the abiotic  
859 environment. *Annu Rev Ecol Evol Syst*. **44**, 5–29 (2013).
- 860 49. Zan, Y. & Carlborg, Ö. Dynamic genetic architecture of yeast response to environmental  
861 perturbation shed light on origin of cryptic genetic variation. *PLoS Genet*. **16**, e1008801  
862 (2020).
- 863 50. Wang, B. et al. Genome-wide selection and genetic improvement during modern maize  
864 breeding. *Nat Genet*. **52**, 565–71 (2020).
- 865 51. Law, M. et al. Automated update, revision, and quality control of the maize genome  
866 annotations using MAKER-P improves the B73 RefGen\_v3 gene models and identifies  
867 new genes. *Plant Physiol*. **167**, 25–39 (2015).
- 868 52. Meng, X., Muszynski, M.G. & Danilevskaya, O.N. The FT-like ZCN8 gene functions as  
869 a floral activator and is involved in photoperiod sensitivity in maize. *Plant Cell*. **23**, 942–  
870 60 (2011).
- 871 53. Murakami, M., Yamashino, T. & Mizuno, T. Characterization of circadian-associated  
872 APRR3 pseudo-response regulator belonging to the APRR1/TOC1 quintet in  
873 *Arabidopsis thaliana*. *Plant Cell Physiol*. **45**, 645–50 (2004).
- 874 54. Kumar, S.V. et al. Transcription factor PIF4 controls the thermosensory activation of  
875 flowering. *Nature*. **484**, 242–5 (2012).
- 876 55. Matsoukas, I.G., Massiah, A.J. & Thomas, B. Starch metabolism and antiflorigenic  
877 signals modulate the juvenile-to-adult phase transition in *Arabidopsis*. *Plant Cell*  
878 *Environ*. **36**, 1802–11 (2013).
- 879 56. Yang, J., Lee, S.H., Goddard, M.E. & Visscher, P.M. GCTA: a tool for genome-wide  
880 complex trait analysis. *Am J Hum Genet*. **88**, 76–82 (2011).

- 881 57. Lee, S.H., Yang, J., Goddard, M.E., Visscher, P.M. & Wray, N.R. Estimation of  
882 pleiotropy between complex diseases using single-nucleotide polymorphism-derived  
883 genomic relationships and restricted maximum likelihood. *Bioinformatics*. **28**, 2540–2  
884 (2012).
- 885 58. Yano, K. et al. GWAS with principal component analysis identifies a gene  
886 comprehensively controlling rice architecture. *Proc Natl Acad Sci U S A*. **116**, 21262–7  
887 (2019).
- 888 59. Weber S.L. & Scheiner S.M. The genetics of phenotypic plasticity. IV. Chromosomal  
889 localization. *J Evol Biol*. **5**, 109–20 (1992).
- 890 60. Zhou, X. & Stephens, M. Genome-wide efficient mixed-model analysis for association  
891 studies. *Nat Genet*. **44**, 821–4 (2012).
- 892 61. Yang, J. et al. Conditional and joint multiple-SNP analysis of GWAS summary statistics  
893 identifies additional variants influencing complex traits. *Nat Genet*. **44**, 369–75 (2012).
- 894 62. Li, M-X., Yeung, J.M.Y., Cherny, S.S. & Sham, P.C. Evaluating the effective numbers  
895 of independent tests and significant p-value thresholds in commercial genotyping arrays  
896 and public imputation reference datasets. *Hum Genet*. **131**, 747–56 (2012).
- 897 63. Berisa, T. & Pickrell, J.K. Approximately independent linkage disequilibrium blocks in  
898 human populations. *Bioinformatics*. **32**, 283–5 (2016).
- 899 64. Foley, C.N. et al. A fast and efficient colocalization algorithm for identifying shared  
900 genetic risk factors across multiple traits. *Nat Commun*. **12**, 764 (2021).
- 901 65. Bakshi, A. et al. Fast set-based association analysis using summary data from GWAS  
902 identifies novel gene loci for human complex traits. *Sci Rep*. **6**, 32894 (2016).
- 903 66. Bolger, A.M., Lohse, M. & Usadel, B. Trimmomatic: a flexible trimmer for Illumina  
904 sequence data. *Bioinformatics*. **30**, 2114–20 (2014).
- 905 67. Dobin, A. et al. STAR: ultrafast universal RNA-seq aligner. *Bioinformatics*. **29**, 15–21  
906 (2013).
- 907 68. Anders, S., Pyl, P.T. & Huber, W. HTSeq—a Python framework to work with high-  
908 throughput sequencing data. *Bioinformatics*. **31**, 166–9 (2015).
- 909 69. Fischer, D.S., Theis, F.J. & Yosef, N. Impulse model-based differential expression  
910 analysis of time course sequencing data. *Nucleic Acids Res*. **46**, e119 (2018).
- 911 70. Endelman, J.B. Ridge regression and other kernels for genomic selection with R package  
912 rrBLUP. *Plant Genome*. **4**, 250–5 (2011).
